# Supplementary material for: Improvement of self-cleaning waterborne polyurethane-acrylate with cationic TiO2/reduced graphene oxide
Source: Royal Society of Chemistry journal article supplement (doi:10.1039/c9ra03250a), 2019-01-01
Supplement: c9ra03250a1.pdf [file c9ra03250a1.pdf]

## Electronic Supplementary Information

### Improvement of self-cleaning waterborne polyurethane-acrylate with cationic TiO<sub>2</sub>/reduced graphene oxide

Gang Chen, Si Ouyang, Yiqing Deng, Mengxiao Chen, Yanqing Zhao, Wangcai Zou, and Qiang Zhao\*

<sup>a</sup> School of Chemical Engineering, Sichuan University, Chengdu, Sichuan, 610065, P. R. China.

[\*] Corresponding authors' e-mail: [zhaoqiang@scu.edu.cn](mailto:zhaoqiang@scu.edu.cn)

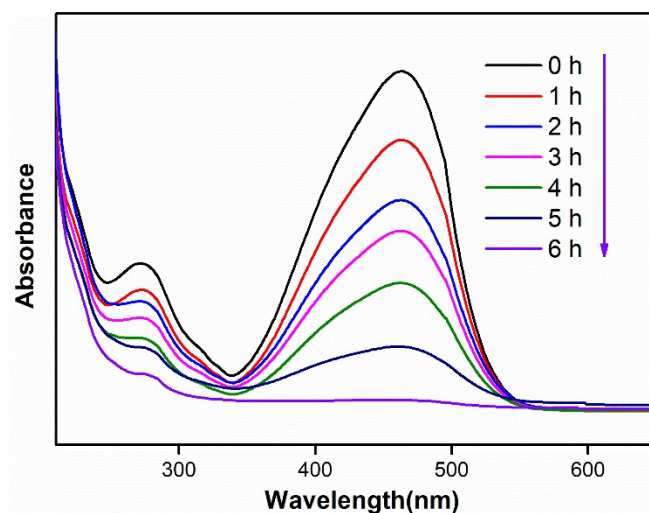

Figure s1. Time-dependent UV absorption spectra of MO solutions under visible light illumination.

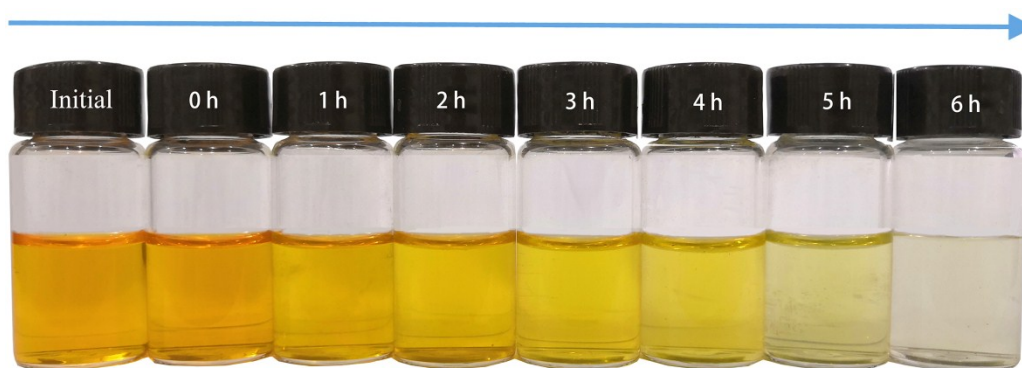

Figure s2. Image showing the degradation of MO by 0.5 C-TiO<sub>2</sub>/rGO-WPUA at different times under visible light illumination.
